# Supplementary material for: Increase In Il-31 Serum Levels Is Associated With Reduced Structural Damage In Early Axial Spondyloarthritis
Source: PubMed Central journal article supplement (PMC5956108; doi:10.1038/s41598-018-25722-z), 2018-05-16
Supplement: 41598_2018_25722_MOESM1_ESM.pdf [file 41598_2018_25722_MOESM1_ESM.pdf]

**INCREASE IN IL-31 SERUM LEVELS IS ASSOCIATED WITH REDUCED  
STRUCTURAL DAMAGE IN EARLY AXIAL SPONDYLOARTHRITIS**

**Data from the DESIR Cohort**

Nicolas Rosine<sup>1</sup>, Adrien Etcheto<sup>1,2</sup>, Houria Hendel-Chavez<sup>3</sup>, Raphaële Seror<sup>4</sup>, Karine Briot<sup>1,2</sup>, Anna Molto<sup>1,2</sup>, Philippe Chanson<sup>5</sup>, Yassine Taoufik<sup>3</sup>, Daniel Wendling<sup>6</sup>, Rik Lories<sup>7</sup>, Francis Berenbaum<sup>8</sup>, Rosaline van den Berg<sup>9</sup>, Pascal Claudepierre<sup>10</sup>, Antoine Feydy<sup>11</sup>, Maxime Dougados<sup>1, 2, 12</sup>, Christian Roux<sup>1,2</sup>, Corinne Miceli-Richard<sup>1,12</sup>

| <b>Variables</b> | <b>Mean (sd)</b> | <b>Correlation r</b> | <b>p-value</b> |
|------------------|------------------|----------------------|----------------|
| CRP              | 8.9 (13.7)       | 0.184                | <0.0001        |
| ESR              | 14.8 (16.7)      | 0.098                | 0.0443         |
| Hs CRP           | 8.1 (14.0)       | 0.116                | 0.0158         |
| BASDAI           | 42.5 (20.3)      | 0.001                | 0.9968         |
| BASFI            | 2.9 (2.2)        | 0.019                | 0.6890         |
| BASMI            | 1.9 (1.1)        | -0.004               | 0.4235         |
| ASDAS CRP        | 2.7 (1.0)        | 0.089                | 0.0961         |
| ASDAS ESR        | 2.4 (1.0)        | 0.004                | 0.4590         |
| HAQ-AS           | 0.56 (0.49)      | 0.001                | 0.7494         |
| SF36 PCS         | 40.5 (9.2)       | 0.023                | 0.6353         |
| SF36 MCS         | 40.9 (11.3)      | -0.048               | 0.3178         |

**Suppl.Table 1:** correlations of IL-31 with acute phase reactants and disease activity and handicap scores

CRP, C-reactive protein; ESR, erythrocyte sedimentation rate; hsCRP, high-sensitivity CRP; BASDAI, Bath Ankylosing Spondylitis Disease Activity Index; BASFI, Bath Ankylosing Spondylitis Functional Index; BASMI, Bath Ankylosing Spondylitis Metrology Index; ASDAS, Ankylosing Spondylitis Disease Activity Score; HAQ-AS, Health Assessment Questionnaire for Ankylosing Spondylitis; SF-36, short form 36; PCS, Physical Component Summary; MCS, Mental Component summary.

| <b>Variables</b>                 | <b>coefficient</b> | <b>p-value</b> |
|----------------------------------|--------------------|----------------|
| Age                              | -0.033             | 0.7478         |
| Disease duration                 | -0.003             | 0.9587         |
| Male                             | 1.435              | 0.3328         |
| Ever smoking                     | -1.025             | 0.4950         |
| Articular peripheral involvement | 0.227              | 0.8783         |
| Uveitis                          | -5.533             | 0.1047         |
| IBD                              | -0.387             | 0.9475         |
| Psoriasis                        | 0.0950             | 0.9622         |
| HLAB27+                          | -3.356             | 0.1012         |
| CRP                              | 0.113              | 0.0409         |
| ESR                              | 0.095              | 0.0253         |
| Hs CRP                           | 0.108              | 0.0411         |
| mNY-SI                           | 2.414              | 0.1668         |
| MRI-SI                           | 0.584              | 0.7048         |
| MRI spine                        | 0.703              | 0.7119         |
| mSASSS $\geq$ 1                  | -1.17              | 0.0208         |
| Average Syndesmophyte            | -2.55              | 0.0276         |
| Low BMD                          | 5.081              | 0.0582         |
| BASDAI                           | 0.001              | 0.9783         |
| BASFI                            | -0.1166            | 0.7277         |
| BASMI                            | -0.635             | 0.3318         |
| ASDAS CRP                        | 1.257              | 0.1077         |
| ASDAS ESR                        | 0.7485             | 0.3041         |
| HAQ                              | -0.037             | 0.9803         |
| SF36 PCS                         | 0.047              | 0.5544         |
| SF36 MCS                         | -0.013             | 0.8418         |
| Current use of oral NSAIDs       | 0.899              | 0.5824         |
| Current use of DMARDs            | -3.452             | 0.1635         |
| DKK1                             | 0.212              | <0.0001        |
| CD40L                            | 0.025              | <0.0001        |
| Low BMD                          | 5.081              | 0.0582         |

**Suppl Table 2** : Univariate analysis IL-31 level in ASAS-positive group (p<0.15)

IBD, inflammatory bowel disease; HLA-B27, human leukocyte antigen B27; CRP, C-reactive protein; ESR, erythrocyte sedimentation rate; hsCRP, high-sensitivity CRP; mNY-SI, X-ray of sacroiliac joints; MRI-spine, MRI of the whole spine; MRI-SI, MRI of sacroiliac joints; BASDAI, Bath Ankylosing Spondylitis Disease Activity Index; BASFI, Bath Ankylosing Spondylitis Functional Index; BASMI, Bath Ankylosing Spondylitis Metrology Index; ASDAS, Ankylosing Spondylitis Disease Activity Score; HAQ-AS, Health Assessment Questionnaire for Ankylosing Spondylitis; SF-36, short form 36; PCS, Physical Component Summary; MCS, Mental Component summary; mSASSS, modified Stoke Ankylosing Spondylitis Spine Score; NSAIDs, nonsteroidal anti-inflammatory drugs; DMARDs, disease-modifying anti-rheumatic drugs; BMD, bone mineral density.

| <b>Variables</b> | <b>Coefficient</b> | <b>P-value</b> |
|------------------|--------------------|----------------|
| Hs CRP           | 0.015              | 0.8537         |
| mSASSS $\geq$ 1  | -5.939             | 0.0353         |
| Low BMD          | 6.625              | 0.0634         |
| HLA B27+         | 0.983              | 0.7538         |
| ASDAS CRP        | -0.835             | 0.5054         |
| DKK1             | 0.185              | 0.0857         |
| sCD40L           | 0.020              | <0.0001        |

**Suppl Table 3** : Multivariate analysis parameters associated with IL-31  
hsCRP, high-sensitivity CRP; mSASSS, modified Stoke Ankylosing Spondylitis Spine Score; BMD, bone mineral density; HLA-B27, human leukocyte antigen B27; ASDAS, Ankylosing Spondylitis Disease Activity Score.

| <b>Variables</b>                 | <b>Odds ratio (95% CI)</b> | <b>P-value</b>    |
|----------------------------------|----------------------------|-------------------|
| <b>Clinical variables</b>        |                            |                   |
| Age                              | 1.050 [1.012–1.089]        | <b>0.0101</b>     |
| Male                             | 1.392 [0.815–2.376]        | 0.2260            |
| Disease duration                 | 1.008 [0.984–1.033]        | 0.4996            |
| Peripheral articular involvement | 0.959 [0.565–1.628]        | 0.8765            |
| Uveitis                          | 0.798 [0.263–2.416]        | 0.6892            |
| IBD                              | 0.917 [0.109–7.742]        | 0.9363            |
| Psoriasis                        | 0.885 [0.427–1.833]        | 0.7428            |
| Enthesitis                       | 1.262 [0.743–2.142]        | 0.3888            |
| Tobacco use                      | 1.347 [0.790–2.297]        | 0.2745            |
| <b>Biologic variables</b>        |                            |                   |
| HLA-B27-positive                 | 0.710 [0.362–1.393]        | 0.3194            |
| CRP level                        | 1.010 [0.993–1.027]        | 0.2616            |
| ESR                              | 1.011 [0.997–1.026]        | 0.1114            |
| hsCRP level                      | 1.016 [1.000–1.031]        | <b>0.0495</b>     |
| <b>Radiologic variables</b>      |                            |                   |
| mNY-SI                           | 1.450 [0.823–2.556]        | 0.1984            |
| MRI-SI                           | 1.397 [0.812–2.402]        | 0.2274            |
| MRI Spine                        | 1.092 [1.048–1.137]        | <b>&lt;0.0001</b> |
| Low bone density                 | 2.288 [0.918–5.702]        | 0.0757            |
| <b>Treatments</b>                |                            |                   |
| Current use of NSAIDs            | 1.018 [0.570–1.820]        | 0.9511            |
| Use of steroids                  | 1.147 [0.548–2.399]        | 0.7165            |
| Current use of DMARDs            | 1.150 [0.487–2.718]        | 0.7500            |
| <b>Disease activity</b>          |                            |                   |
| BASDAI                           | 1.013 [1.000–1.027]        | <b>0.0499</b>     |
| BASFI                            | 1.076 [0.958–1.209]        | 0.2159            |
| ASDAS-CRP                        | 1.253 [0.959–1.655]        | 0.1117            |
| ASDAS-ESR                        | 1.355 [1.033–1.776]        | <b>0.0280</b>     |
| HAQ week                         | 1.444 [0.863–2.416]        | 0.1613            |
| SF-36 PCS                        | 0.992 [0.964–1.021]        | 0.5888            |
| SF-36 MCS                        | 0.999 [0.976–1.023]        | 0.9600            |
| DKK1 level                       | 1.013 [0.998–1.028]        | 0.1016            |
| sCD40L level                     | 0.971 [0.737–1.281]        | 0.8370            |
| IL-31 level                      | 0.718 [0.559–0.921]        | 0.0092            |

**Suppl Table 4** : Univariate analysis for mSASSS  $\geq$  1

IBD, inflammatory bowel disease; HLA-B27, human leukocyte antigen B27; CRP, C-reactive protein; hsCRP, high-sensitivity CRP; ESR, erythrocyte sedimentation rate; mNY-SI, X-ray of sacroiliac joints; MRI-spine, MRI of the whole spine; MRI-SI, MRI of sacroiliac joints; BMD, bone mineral density; mSASSS, modified Stoke Ankylosing Spondylitis Spine Score; NSAIDs, nonsteroidal anti-inflammatory drugs; DMARDs, disease-modifying anti-rheumatic drugs; BASDAI, Bath Ankylosing Spondylitis Disease Activity Index; BASFI, Bath Ankylosing Spondylitis Functional Index; ASDAS, Ankylosing Spondylitis Disease Activity Score; HAQ-AS, Health Assessment Questionnaire for Ankylosing Spondylitis; SF-36, short form 36; PCS, Physical Component Summary; MCS, Mental Component summary.

| Variables                      | Odds Ratio             | P-value |
|--------------------------------|------------------------|---------|
| Clinics parameters             |                        |         |
| Age                            | 0.992 [0.940 – 1.048]  | 0.7847  |
| Male                           | 7.390 [2.161 – 25.264] | 0.0014  |
| Disease duration               | 1.000 [0.966 – 1.035]  | 1.0000  |
| Articular peripheral involmnet | 1.328 [0.601 – 2.934]  | 0.4837  |
| Uveitis                        | 1.000 [0.268 – 3.732]  | 1.0000  |
| Psoriasis                      | 1.750 [0.687 – 4.459]  | 0.2409  |
| Enthesitis                     | 2.631 [1.170 – 5.921]  | 0.0194  |
| Tobacco                        | 1.508 [0.680 – 3.344]  | 0.3121  |
| Biologics parameters           |                        |         |
| HLA B27+                       | 0.780 [0.275 – 2.216]  | 0.6410  |
| CRP                            | 1.049 [1.026 – 1.072]  | <0.0001 |
| ESR                            | 1.046 [1.024 – 1.068]  | <0.0001 |
| HsCRP                          | 1.043 [1.021 – 1.065]  | 0.0001  |
| Radiologics parameters         |                        |         |
| mNY-SI                         | 4.870 [2.112 – 11.228] | 0.0002  |
| MRI-SI                         | 3.047 [1.261 – 7.362]  | 0.0133  |
| MRI-Spine                      | 1.088 [1.028 – 1.151]  | 0.0003  |
| Treatments                     |                        |         |
| Current use of NSAID           | 0.948 [0.395 – 2.279]  | 0.9055  |
| Use of steroids                | 1.825 [0.677 – 4.923]  | 0.2347  |
| Current use of DMARDs          | 1.917 [0.592 – 6.209]  | 0.2780  |
| Disease activity               |                        |         |
| BASDAI                         | 1.012 [0.993 – 1.031]  | 0.2309  |
| BASFI                          | 1.151 [0.975 – 1.360]  | 0.0970  |
| ASDAS-CRP                      | 1.987 [1.299 – 3.040]  | 0.0016  |
| ASDAS-ESR                      | 1.900 [1.271 – 2.841]  | 0.0018  |
| HAQ week                       | 1.539 [0.724 – 3.371]  | 0.2629  |
| Score PCS                      | 0.991 [0.950 – 1.034]  | 0.6781  |
| Score MCS                      | 0.980 [0.946 – 1.016]  | 0.2808  |
| DKK1                           | 1.004 [0.974 – 1.035]  | 0.7992  |
| sCD40L                         | 1.418 [0.980 – 2.052]  | 0.0640  |
| IL-31                          | 1.198 [0.958 – 1.497]  | 0.1130  |

**Suppl Table 5: Univariate analysis low BMD in ASAS-positive group**

IBD, inflammatory bowel disease; HLA-B27, human leukocyte antigen B27; CRP, C-reactive protein; hsCRP, high-sensitivity CRP; ESR, erythrocyte sedimentation rate; mNY-SI, X-ray of sacroiliac joints; MRI-spine, MRI of the whole spine; MRI-SI, MRI of sacroiliac joints; BMD, bone mineral density; mSASSS, modified Stoke Ankylosing Spondylitis Spine Score; NSAIDs, nonsteroidal anti-inflammatory drugs; DMARDs, disease-modifying anti-rheumatic drugs; BASDAI, Bath Ankylosing Spondylitis Disease Activity Index; BASFI, Bath Ankylosing Spondylitis Functional Index; ASDAS, Ankylosing Spondylitis Disease Activity Score; HAQ-AS, Health Assessment Questionnaire for Ankylosing Spondylitis; SF-36, short form 36; PCS, Physical Component Summary; MCS, Mental Component summary.

| <b>Variables</b> | <b>Odds ratio (95% CI)</b> | <b>P-value</b> |
|------------------|----------------------------|----------------|
| Male             | 7.582 [1.381 – 41.634]     | 0.0197         |
| Enthesitis       | 3.666 [1.181 – 11.381]     | 0.0246         |
| hsCRP            | 1.002 [0.968 – 1.037]      | 0.9208         |
| mNY-SI           | 4.279 [1.116 – 16.400]     | 0.0339         |
| MRI-SI           | 1.940 [0.582 – 6.464]      | 0.2803         |
| MRI-Spine        | 0.910 [0.241 – 3.432]      | 0.8887         |
| ASDAS ESR        | 2.146 [0.986 – 4.668]      | 0.0542         |
| BASFI            | 0.948 [0.705 – 1.275]      | 0.7230         |
| sCD40L level     | 1.207 [0.732 – 1.990]      | 0.4610         |

**Suppl Table 6:** Multivariate analysis of low BMD in ASAS-positive group, assessing the contribution of sCD40L

\*Odds ratio for each 1-SD increase in sCD40L level (SD=344.81 pg/ml)

hsCRP, high-sensitivity CRP; mNY-SI, X-ray of sacroiliac joints; MRI-spine, MRI of the whole spine; MRI-SI, MRI of sacroiliac joints; ASDAS, Ankylosing Spondylitis Disease Activity Score; BASFI, Bath Ankylosing Spondylitis Functional Index.

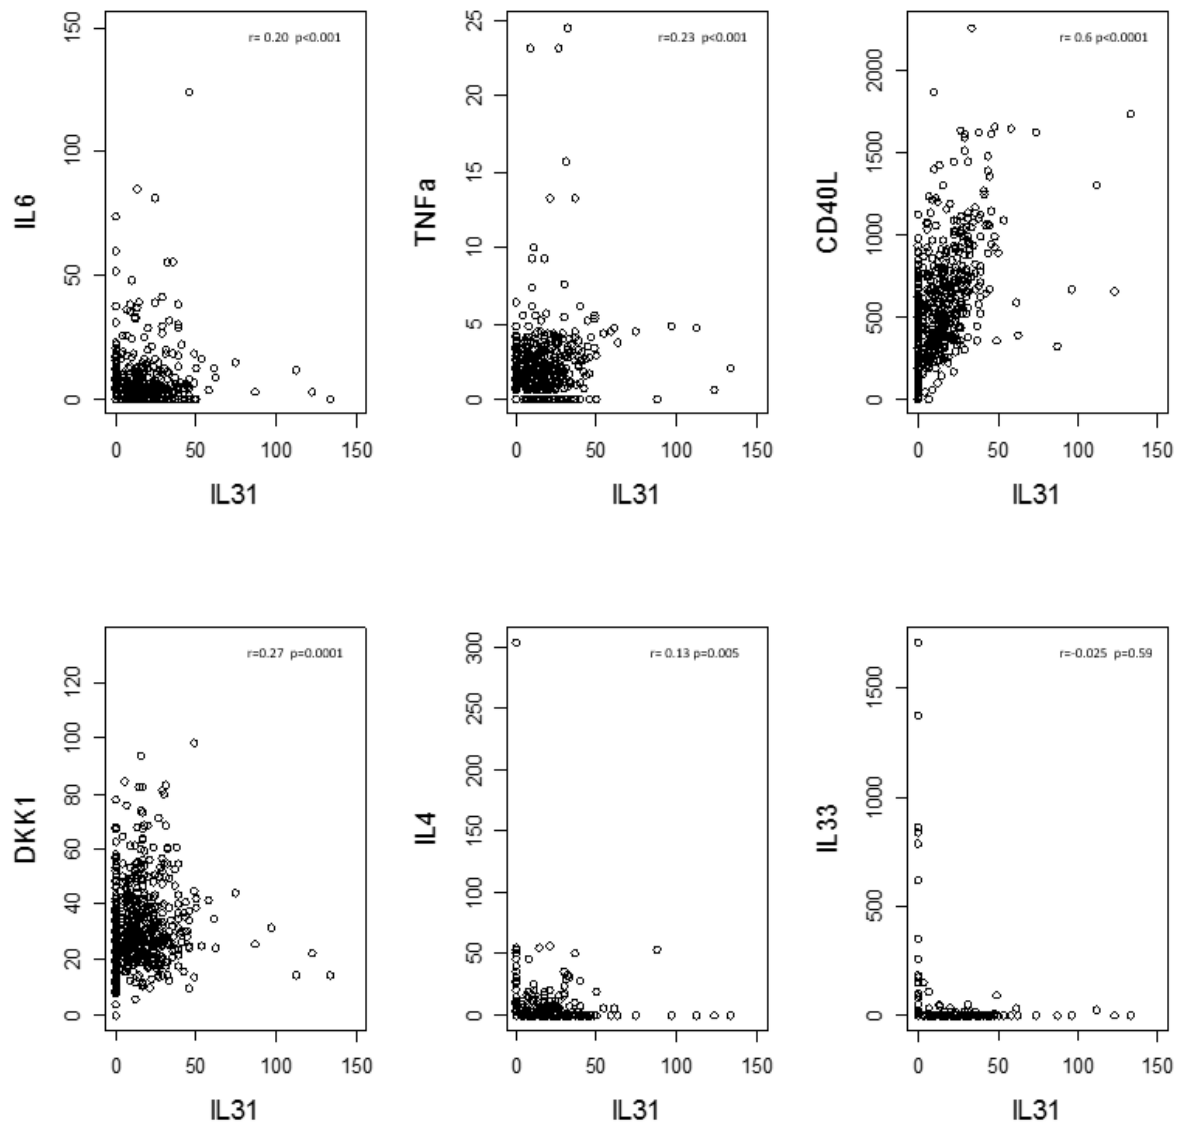

**Suppl. Figure 1:** Correlation analysis of serum levels of IL-31 and IL-6, tumor necrosis factor  $\alpha$  (TNF $\alpha$ ), sCD40L, DKK-1, IL-4, and IL-33.
